# Supplementary material for: Single-Cell Transcriptomic Profiling of MAIT Cells in Patients With COVID-19
Source: PubMed Central journal article supplement (PMC8363247; doi:10.3389/fimmu.2021.700152), 2021-07-30
Supplement: Table_1.pdf [file Table_1.pdf]

**TABLES1 The average expression levels of DEGs (18 genes) in patients with COVID-19**

| <b>Gene</b>    | <b>HD</b> | <b>Moderate</b> | <b>Severe</b> | <b>Conv</b> |
|----------------|-----------|-----------------|---------------|-------------|
| <b>RGCC</b>    | 1.8057778 | 0.3583978       | 0.368074      | 0.4496276   |
| <b>LMNA</b>    | 1.4306957 | 0.2045604       | 0.3706122     | 0.2507561   |
| <b>ZFP36</b>   | 3.1116211 | 2.105539        | 2.5873654     | 2.8280009   |
| <b>IFITM1</b>  | 2.5996153 | 3.6680177       | 3.6502303     | 2.7939906   |
| <b>IFI44L</b>  | 0.1219209 | 1.9507918       | 1.7254891     | 0.5390879   |
| <b>IFI6</b>    | 0.4808825 | 2.0833148       | 2.0247155     | 0.7983474   |
| <b>ISG15</b>   | 0.5635043 | 1.9598343       | 1.8889938     | 0.8331265   |
| <b>XAF1</b>    | 0.3536548 | 1.5144287       | 1.5013227     | 0.6306834   |
| <b>LY6E</b>    | 1.3300551 | 2.2038626       | 2.1525841     | 1.4674954   |
| <b>MX1</b>     | 0.2395943 | 1.216716        | 1.2287709     | 0.4884723   |
| <b>IRF7</b>    | 0.2379167 | 1.0572997       | 1.2055328     | 0.4538004   |
| <b>OAS1</b>    | 0.0555059 | 0.7738829       | 0.8936585     | 0.2354653   |
| <b>EIF2AK2</b> | 0.4184069 | 1.3384711       | 1.1712159     | 0.5026022   |
| <b>TRIM22</b>  | 0.6230162 | 1.3511981       | 1.2381396     | 0.8600541   |
| <b>TXNIP</b>   | 2.1251668 | 2.7736953       | 3.1983573     | 2.5645407   |
| <b>MT-ND6</b>  | 2.0315623 | 1.2586603       | 0.9822262     | 1.5298497   |
| <b>JUN</b>     | 3.1908369 | 3.523035        | 2.9550407     | 3.9216512   |
| <b>FOS</b>     | 3.6319925 | 2.9654253       | 2.7075689     | 3.8156373   |

For each DEG, they were calculated by averaging the expression levels of cells in HD, Moderate, Severe and Conv condition, respectively. The “AverageExpression” function from Seurat (v.3.2.2) package was used for the calculation of these average expression levels.
